# Supplementary material for: Sr 8 MgSc(PO 4 ) 7 :Eu 2+ phosphor: d–f transition driven applications for solid-state lighting and extreme environment multimode sensing investigations
Source: Royal Society of Chemistry journal article supplement (doi:10.1039/d4qi02664k), 2024-12-09
Supplement: d4qi02664k1.pdf [file d4qi02664k1.pdf]

**Sr<sub>8</sub>MgSc(PO<sub>4</sub>)<sub>7</sub>:Eu<sup>2+</sup> Phosphor: d – f Transition Driven Applications  
for Solid-State Lighting and Extreme Environment Multimode  
Sensing Inspections**

**Table S1.** Ionic radii of Sr<sup>2+</sup> and Eu<sup>2+</sup> in different coordination environments.

| Ion              | Coordination | Ionic Radius (Å) |
|------------------|--------------|------------------|
| Sr <sup>2+</sup> | VI           | 1.18             |
|                  | VII          | 1.21             |
|                  | VIII         | 1.26             |
|                  | IX           | 1.31             |
|                  | X            | 1.36             |
| Eu <sup>2+</sup> | VI           | 1.17             |
|                  | VII          | 1.20             |
|                  | VIII         | 1.25             |
|                  | IX           | 1.30             |
|                  | X            | 1.35             |

**Table S2.** Quantum efficiency of SMSP: $x\%$  Eu<sup>2+</sup> ( $x = 0.025 - 1$ ) phosphors

| Sample                     | $\eta_{IQE}$ (%) | $\eta_{EQE}$ (%) |
|----------------------------|------------------|------------------|
| SMSP:0.025Eu <sup>2+</sup> | 17.9%            | 9.8%             |
| SMSP:0.05Eu <sup>2+</sup>  | 25.67%           | 14.7%            |
| SMSP:0.1Eu <sup>2+</sup>   | 29.64%           | 18.1%            |
| SMSP:0.2Eu <sup>2+</sup>   | 31.27%           | 19.6%            |
| SMSP:0.5Eu <sup>2+</sup>   | 21.45%           | 12.3%            |
| SMSP:1Eu <sup>2+</sup>     | 15.85%           | 8.9%             |

**Table S3.** Bond length of the Sr1-O for the SMSP:0.2% Eu<sup>2+</sup> and SMSP host samples.

|               | SMSP host  | SMSP:0.2% Eu <sup>2+</sup> |
|---------------|------------|----------------------------|
| Sr1-O1        | 3.10771(1) | 3.33724(1)                 |
| Sr1-O3        | 3.29204(2) | 3.19379(8)                 |
| Sr1-O7        | 3.06274(2) | 2.81341(1)                 |
| Sr1-O8        | 2.77284(1) | 2.74760(1)                 |
| Sr1-O9        | 2.47385(1) | 2.55908(7)                 |
| Sr1-O12       | 2.51631(1) | 2.92903(6)                 |
| Sr1-O13       | 2.65096(1) | 2.31305(7)                 |
| Sr1-O14       | 2.89014(7) | 2.71916(6)                 |
| Average Sr1-O | 2.84672    | 2.82651                    |

**Table S4.** Bond length of the Sr2-O for the SMSP:0.2% Eu<sup>2+</sup> and SMSP host samples.

|               | SMSP host  | SMSP:0.2% Eu <sup>2+</sup> |
|---------------|------------|----------------------------|
| Sr2-O2        | 2.74370(1) | 2.76115(1)                 |
| Sr2-O4        | 2.54253(1) | 2.71409(9)                 |
| Sr2-O5        | 2.94653(1) | 2.75710(1)                 |
| Sr2-O6        | 2.53527(1) | 2.77373(8)                 |
| Sr2-O10       | 2.53808(1) | 2.58961(7)                 |
| Sr2-O12       | 2.54356(9) | 2.44142(7)                 |
| Sr2-O13       | 2.35415(1) | 2.58378(1)                 |
| Sr2-O14       | 2.71012(6) | 2.88999(9)                 |
| Average Sr2-O | 2.61493    | 2.68892                    |

**Table S5.** Bond length of the Sr3-O for the SMSP:0.2% Eu<sup>2+</sup> and SMSP host samples.

|               | SMSP host  | SMSP:0.2% Eu <sup>2+</sup> |
|---------------|------------|----------------------------|
| Sr3-O1        | 2.67841(3) | 3.25581(9)                 |
| Sr3-O2        | 3.32560(5) | 3.08125(9)                 |
| Sr3-O5        | 3.08651(8) | 3.27481(9)                 |
| Sr3-O6        | 2.82945(6) | 2.33764(8)                 |
| Sr3-O7        | 2.60307(6) | 2.49114(8)                 |
| Sr3-O9        | 2.53353(2) | 2.71164(5)                 |
| Sr3-O11       | 2.40011(7) | 2.52803(7)                 |
| Average Sr3-O | 2.77961    | 2.81150                    |

**Table S6.** Bond length of the Sr5-O for the SMSP:0.2% Eu<sup>2+</sup> and SMSP host samples.

|               | SMSP host  | SMSP:0.2% Eu <sup>2+</sup> |
|---------------|------------|----------------------------|
| Sr5-O1        | 2.48860(8) | 2.62239(7)                 |
| Sr5-O3        | 2.63180(1) | 2.63960(1)                 |
| Sr5-O3        | 2.82673(4) | 2.98858(3)                 |
| Sr5-O4        | 2.71201(2) | 2.63836(4)                 |
| Sr5-O7        | 2.41515(9) | 2.31262(1)                 |
| Sr5-O11       | 2.51298(6) | 2.47610(2)                 |
| Sr5-O13       | 2.68101(6) | 2.72184(8)                 |
| Average Sr5-O | 2.60983    | 2.62850                    |

**Table S7.** Comparison of luminescence thermal stability of different phosphors

| Sample                                                                | $\lambda_{\text{ex}}$ (nm) | $I_{373\text{ K}}/I_{298\text{ K}}$ (%) | Reference |
|-----------------------------------------------------------------------|----------------------------|-----------------------------------------|-----------|
| SMSP: Eu <sup>2+</sup>                                                | 342                        | 50.01                                   | This work |
| Sr <sub>9</sub> LiMg(PO <sub>4</sub> ) <sub>7</sub> :Eu <sup>2+</sup> | 405                        | 27                                      | [1]       |
| Sr <sub>9</sub> Sc(PO <sub>4</sub> ) <sub>7</sub> :Eu <sup>2+</sup>   | 360                        | 30                                      | [2]       |
| Ba <sub>3</sub> Si <sub>6</sub> O <sub>15</sub> :Eu <sup>2+</sup>     | 360                        | 26                                      | [3]       |

**Table S8.** The optical properties of WLED devices have been reported.

| Samples                                                                                                 | CIE (x, y)       | CCT (K) | Ra   | references |
|---------------------------------------------------------------------------------------------------------|------------------|---------|------|------------|
| SMSP:0.2% Eu <sup>2+</sup>                                                                              | (0.3509, 0.3397) | 4718 K  | 93.2 | This work  |
| Ba <sub>3</sub> GdNa(PO <sub>4</sub> ) <sub>3</sub> F:Eu <sup>2+</sup>                                  | (0.273, 0.275)   | 5402 K  | 81   | [4]        |
| Ba <sub>2</sub> Ca(PO <sub>4</sub> ) <sub>1.6</sub> (BO <sub>3</sub> ) <sub>0.4</sub> :Eu <sup>2+</sup> | —                | 6488 K  | 90.4 | [5]        |
| K <sub>2</sub> BaCa(PO <sub>4</sub> ) <sub>2</sub> :Eu <sup>2+</sup> , Mn <sup>2+</sup>                 | (0.298, 0.383)   | 6789 K  | 74.7 | [6]        |

**Table S9.** Comparison of  $d\lambda / dp$  and red shift values of different rare earth doped phosphors under high pressure

| Sample                                                                                             | $\lambda_{ex}$ (nm) | $d\lambda / dp$ | Red shift (nm) | Ref       |
|----------------------------------------------------------------------------------------------------|---------------------|-----------------|----------------|-----------|
| SMSP:Eu <sup>2+</sup>                                                                              | 342                 | 2.03            | 42             | This work |
| BaLi <sub>2</sub> Al <sub>2</sub> Si <sub>2</sub> N <sub>6</sub> : Eu <sup>2+</sup>                | 400                 | 1.5813          | 35             | [7]       |
| Mg <sub>2</sub> Gd <sub>8</sub> (SiO <sub>4</sub> ) <sub>6</sub> O <sub>2</sub> :Ce <sup>3+</sup>  | 490                 | 1.8453          | 60             | [8]       |
| Lu <sub>2</sub> Mg <sub>2</sub> Al <sub>2</sub> Si <sub>2</sub> O <sub>12</sub> : Eu <sup>2+</sup> | 355                 | 1.68            | 19             | [9]       |

**Table S10.** Comparison of pressure sensing sensitivity of different rare earth doped phosphors

| Materials                                                                                                            | Pressure     | $S_{pa}$ (GPa <sup>-1</sup> ) | $S_{pr}$ (% GPa <sup>-1</sup> ) | Ref.      |
|----------------------------------------------------------------------------------------------------------------------|--------------|-------------------------------|---------------------------------|-----------|
| SMSP:Eu <sup>2+</sup>                                                                                                | 0 – 21.5 GPa | 0.96                          | 21.8                            | this work |
| Lu <sub>2</sub> Mg <sub>2</sub> Al <sub>2</sub> Si <sub>2</sub> O <sub>12</sub> :Eu <sup>2+</sup> , Mn <sup>2+</sup> | 0 – 25.6 GPa | 0.0494                        | 1.89                            | [10]      |
| SrB <sub>4</sub> O <sub>7</sub> :Eu <sup>2+</sup> /Sm <sup>2+</sup>                                                  | 10 – 40 GPa  | 0.35                          | 13.8                            | [11]      |
| Li <sub>4</sub> SrCa(SiO <sub>4</sub> ) <sub>2</sub> :Eu <sup>2+</sup>                                               | 0 – 15.7 GPa | 0.299                         | 9.9                             | [12]      |

**Table S11.** Comparison of pressure dynamic sensitivity of different phosphors

| Materials                                                          | Pressure      | $S_{pr}(\% \text{ GPa}^{-1})$ | Ref.      |
|--------------------------------------------------------------------|---------------|-------------------------------|-----------|
| SMSP:Eu <sup>2+</sup>                                              | 0 – 21.5 GPa  | 116.22                        | this work |
| LiScGeO <sub>4</sub> :Cr <sup>3+</sup>                             | 0 – 9.78 GPa  | 121.14                        | [13]      |
| Li <sub>2</sub> Mg <sub>3</sub> TiO <sub>6</sub> :Cr <sup>3+</sup> | 0 – 10.05 GPa | 4.7                           | [14]      |
| MgO:Cr <sup>3+</sup>                                               | 0 – 8 GPa     | 9.83                          | [15]      |

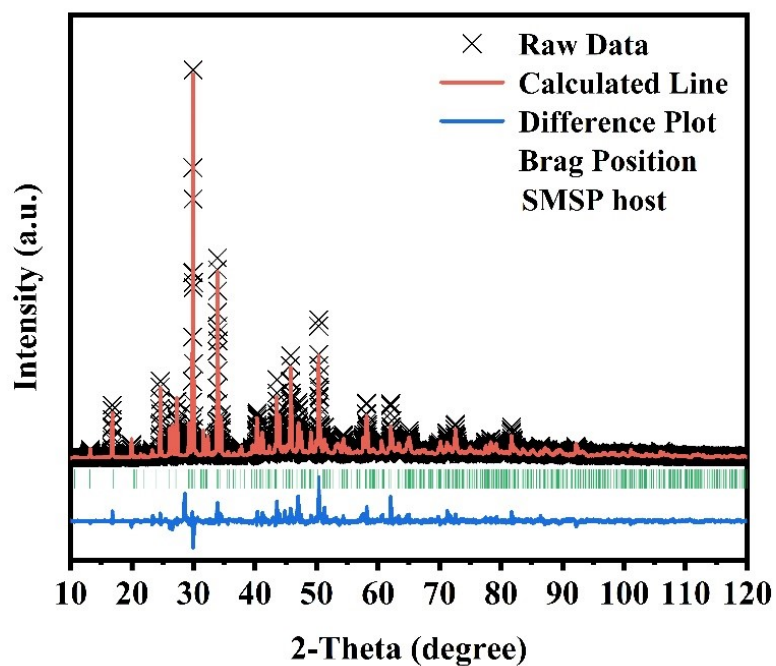

**Fig. S1** Rietveld analysis patterns for XRD data of the SMSP host.

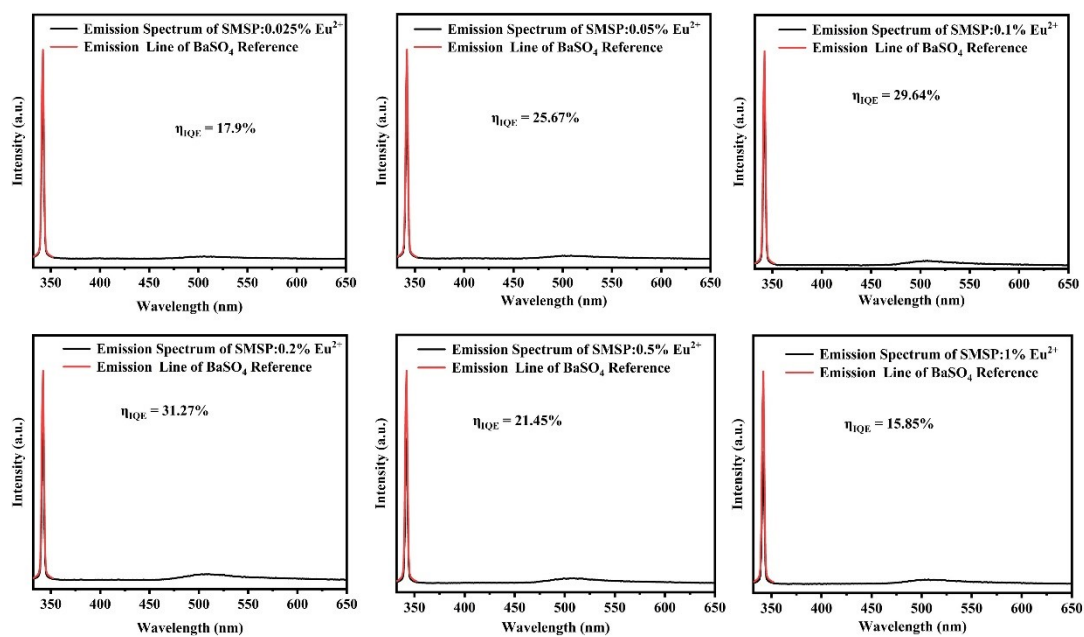

**Fig. S2** Quantum efficiency of SMSP: $x\%$   $\text{Eu}^{2+}$  ( $x = 0.025 - 1$ ) phosphors



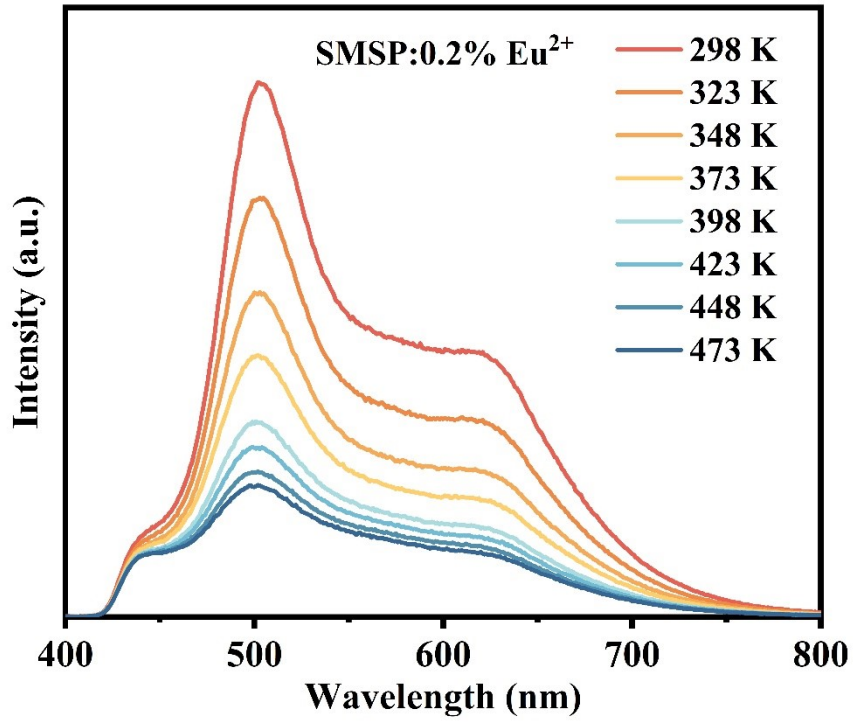

Fig. S3 PL spectra of SMSP:0.2% Eu<sup>2+</sup> at 298K-473K temperature

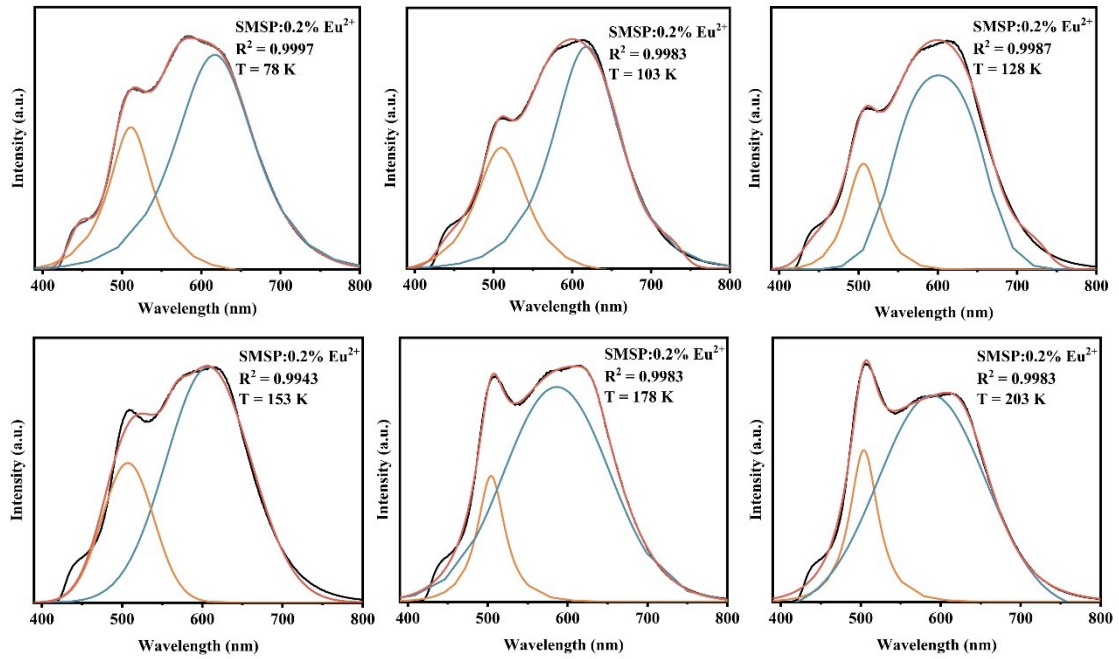

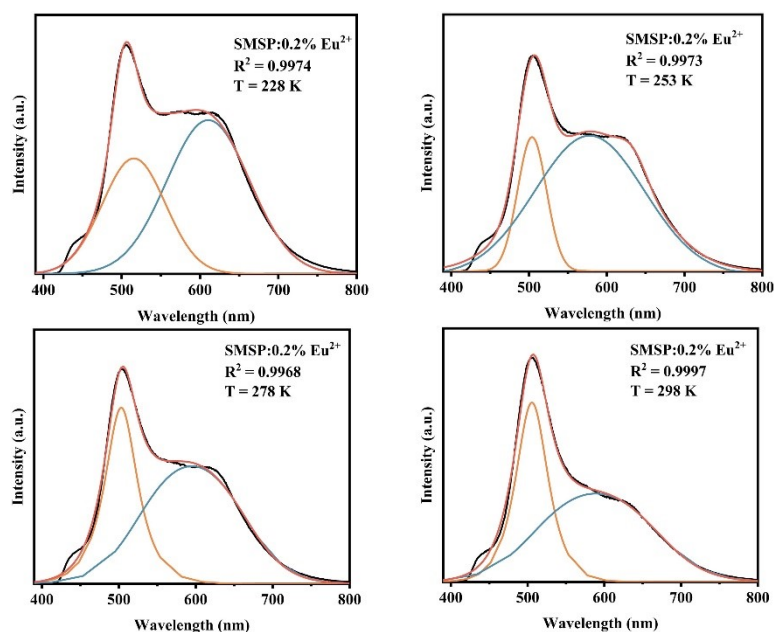

**Fig. S4** Gaussian fitting diagrams of two position of SMSP:0.2% Eu<sup>2+</sup> under different temperature (289 K → 78 K)

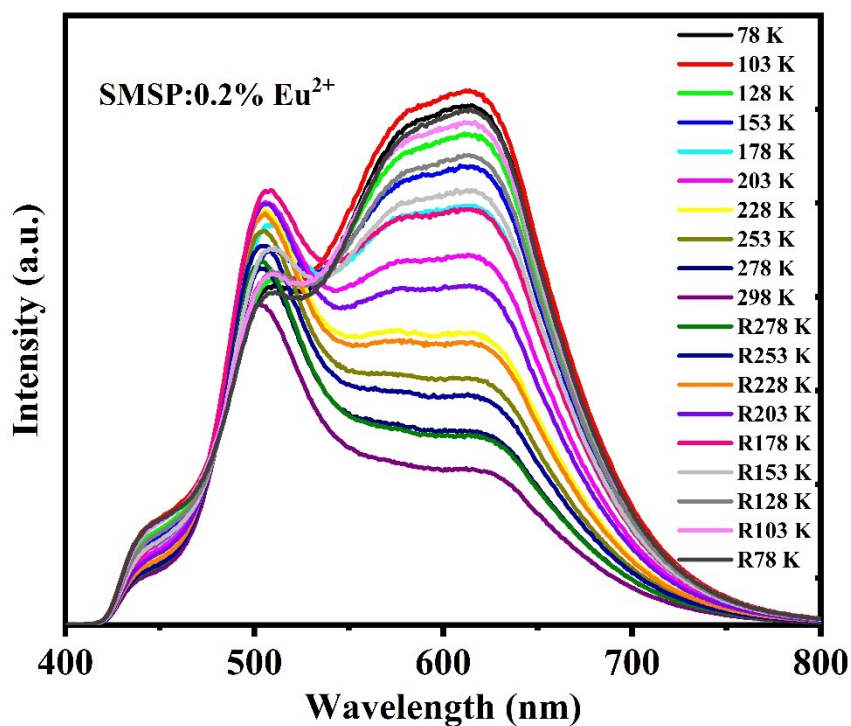

**Fig. S5** PL spectra of SMSP:0.2% Eu<sup>2+</sup> at 298K-78K-298K temperature

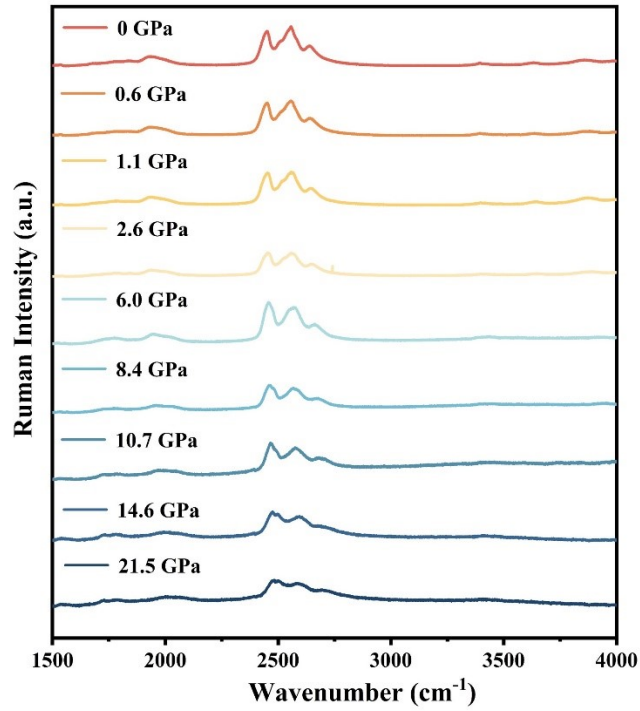

**Fig. S6** Raman spectra of the SMSP:0.2% Eu<sup>2+</sup> sample at different pressures

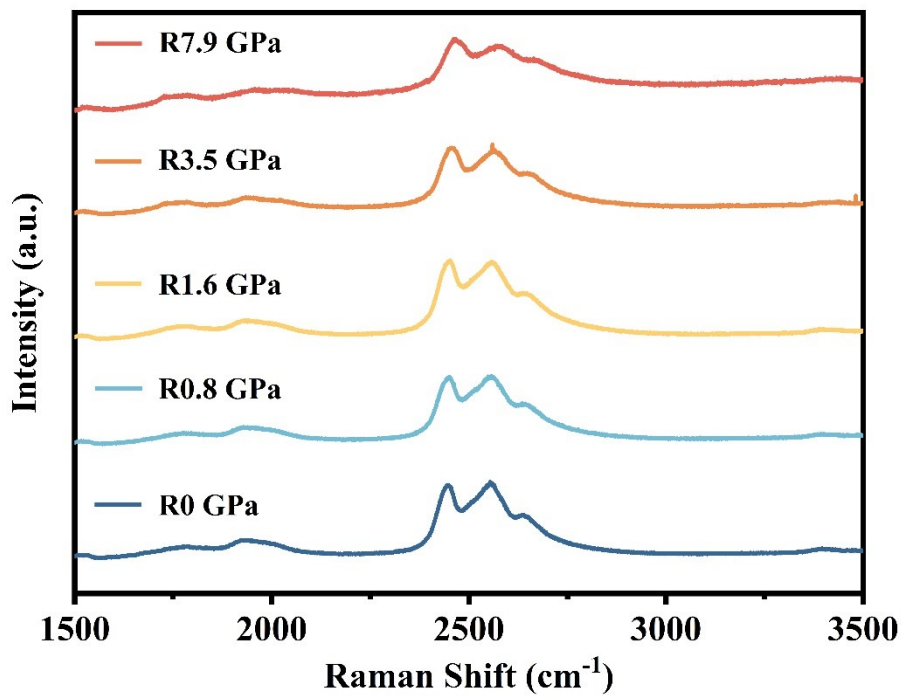

**Fig. S7** Raman spectra of the SMSP:0.2% Eu<sup>2+</sup> sample during decompression.

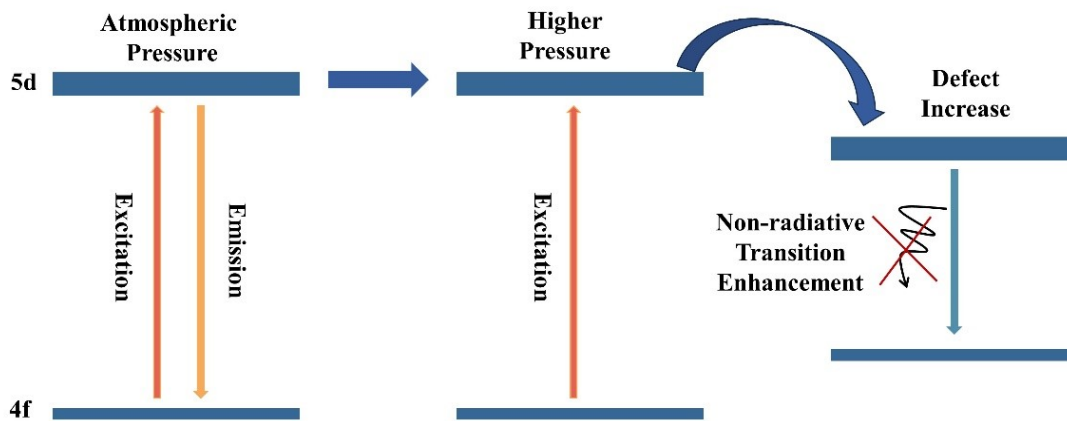

**Fig. S8** Schematic diagram of the influence of defects on the intensity

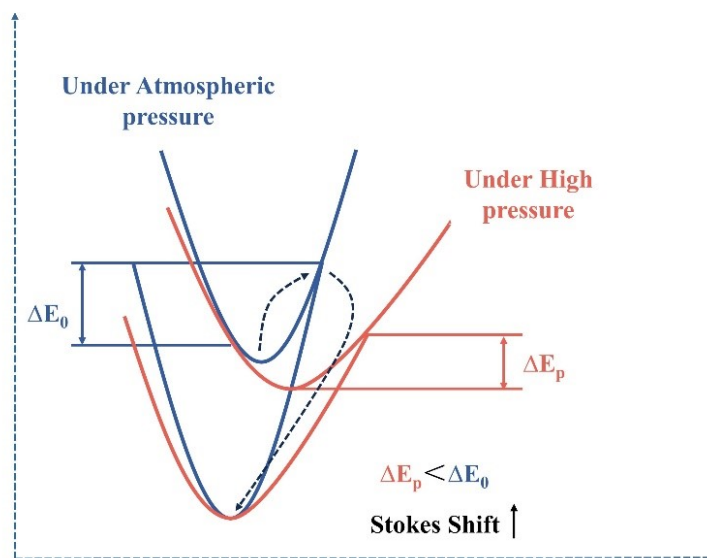

**Fig. S9** Schematic illustration of the nonradiative transition.

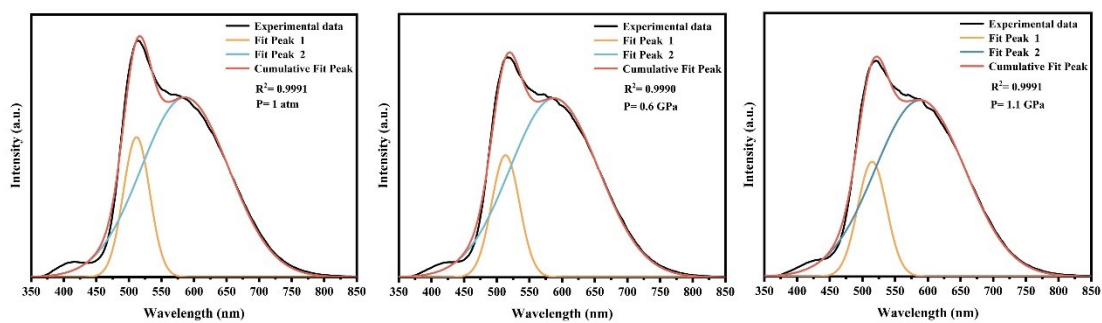

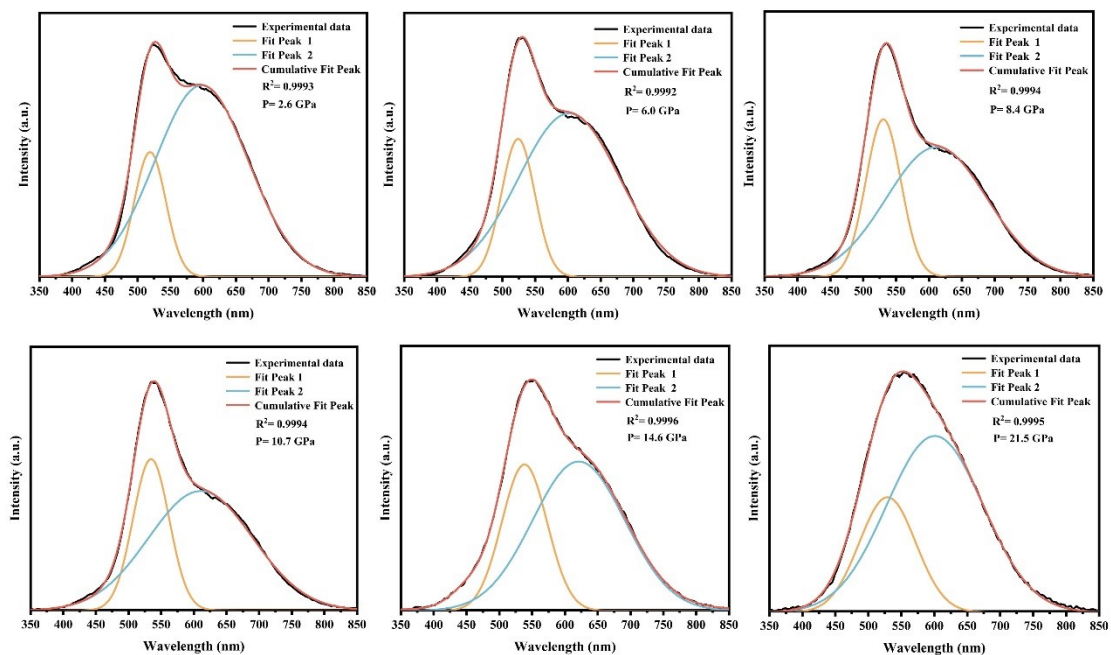

**Fig. S10** Gaussian fitting diagrams of two positions of SMSP:0.2%  $\text{Eu}^{2+}$  under different pressures

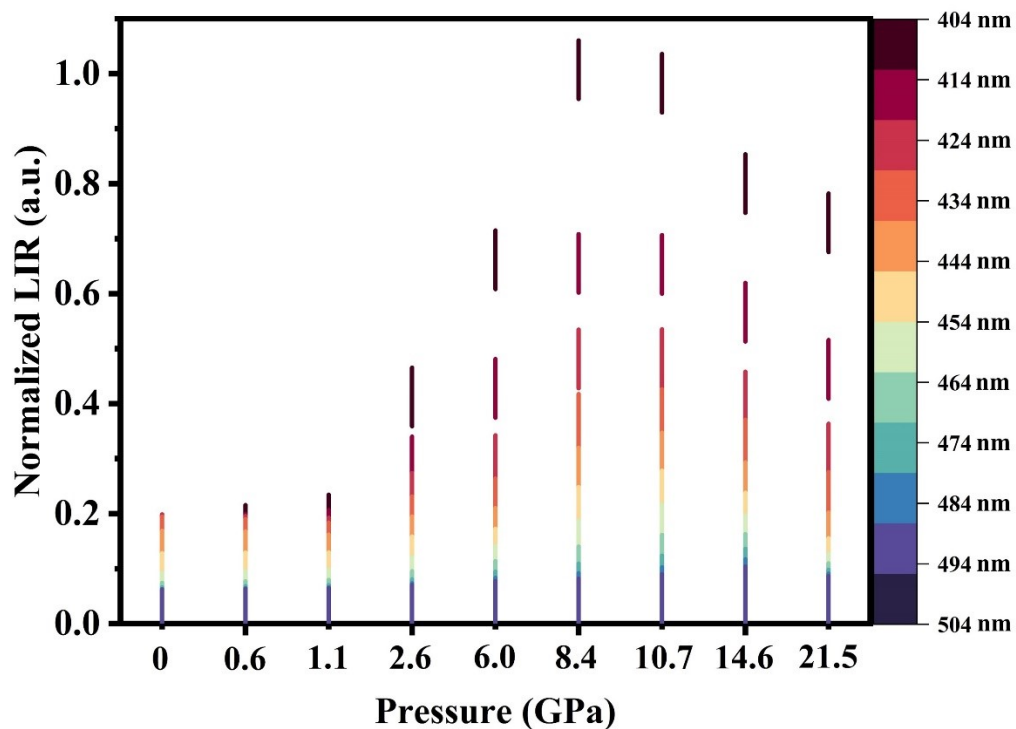

**Fig. S11** The LIR as a function of pressure.

$$LIR = 0.038 - 0.046p + 0.029p^2 - 7.6 \times 10^{-3}p^3 + 9.8 \times 10^{-4}p^4 - 4.8 \times 10^{-5}p^5$$

(F1)

Quantum efficiency calculation formula:<sup>[16]</sup>

$$\eta_{IQE} = \frac{\varepsilon}{\alpha} = \frac{\int_{E_R}^{L_S}}{\int_{E_R} - \int_{E_S}} \quad (F2)$$

$$\alpha_{abs} = \frac{\alpha}{\delta} = \frac{\int_{E_R} - \int_{E_S}}{\int_{E_R}} \quad (F3)$$

$$\eta_{EQE} = \frac{\varepsilon}{\delta} = \frac{\int_{E_R}^{L_S}}{\int_{E_R}} \quad (F4)$$

## References

1. X. Ding, Y. Wang, Novel Orange Light Emitting Phosphor  $\text{Sr}_9(\text{Li, Na, K})\text{Mg}(\text{PO}_4)_7: \text{Eu}^{2+}$  Excited by NUV Light for White LEDs, *Acta Materialia*, 2016, **120**, 281-291.
2. D. Kim, Y.W. Seo, S.H. Park, B.C. Choi, J.H. Kim, J.H. Jeong, Theoretical Design and Characterization of High Efficient  $\text{Sr}_9\text{Ln}(\text{PO}_4)_7: \text{Eu}^{2+}$  Phosphors, *Mater Res Bull*, 2020, **127**, 110856.
3. M. Shang, S. Liang, N. Qu, H. Lian, J. Lin, Influence of Anion/Cation Substitution ( $\text{Sr}^{2+} \rightarrow \text{Ba}^{2+}$ ,  $\text{Al}^{3+} \rightarrow \text{Si}^{4+}$ ,  $\text{N}^{3-} \rightarrow \text{O}^{2-}$ ) on Phase Transformation and Luminescence Properties of

- Ba<sub>3</sub>Si<sub>6</sub>O<sub>15</sub>:Eu<sup>2+</sup> Phosphors, *Chem. Mater*, 2017, **29**(4), 1813-1829.
4. J. Chen, N. Zhang, C. Guo, F. Pan, X. Zhou, H. Suo, X. Zhao and E. M. Goldys, Site-Dependent Luminescence and Thermal Stability of Eu<sup>2+</sup> Doped Fluorophosphate toward White LEDs for Plant Growth, *ACS Appl Mater Interfaces*, 2016, **8**(32), 20856-20864.
  5. X. Sheng, P. Dai, Z. Sun and D. Wen, Site-Selective Occupation of Eu<sup>2+</sup> Activators Toward Full-Visible-Spectrum Emission in Well-Designed Borophosphate Phosphors, *Chem. Eng. J*, 2020, **395**, 125141.
  6. X. Zhang, Z. Zhu, Z. Guo, Z. Sun, Z. Yang, T. Zhang, J. Zhang, Z.-c. Wu and Z. Wang, Dopant Preferential Site Occupation and High Efficiency White Emission in K<sub>2</sub>BaCa(PO<sub>4</sub>)<sub>2</sub>:Eu<sup>2+</sup>, Mn<sup>2+</sup> Phosphors for High Quality White LED Applications, *Inorg. Chem. Front*, 2019, **6**(5), 1289-1298.
  7. Y. Wang, T. Seto, K. Ishigaki, Y. Uwatoko, G. Xiao, B. Zou, G. Li, Z. Tang, Z. Li and Y. Wang, Pressure-Driven Eu<sup>2+</sup>-Doped BaLi<sub>2</sub>Al<sub>2</sub>Si<sub>2</sub>N<sub>6</sub>: A New Color Tunable Narrow-Band Emission Phosphor for Spectroscopy and Pressure Sensor Applications, *Adv. Funct. Mater*, 2020, **30**(34), 2001384.
  8. B. F. Zheng, X. T. Zhang, D. Zhang, F. K. Wang, Z. B. Zheng, X. Y. Yang, Q. Yang, Y. H. Song, B. Zou and H. F. Zou, Ultra-Wideband Phosphor Mg<sub>2</sub>Gd<sub>8</sub>(SiO<sub>4</sub>)<sub>6</sub>O<sub>2</sub>:Ce<sup>3+</sup>, Mn<sup>2+</sup>: Energy Transfer and

- Pressure-Driven Color Tuning for Potential Applications in LEDs and Pressure Sensors, *Chem. Eng. J.*, 2022, **427**, 131897.
9. Z. B. Zheng, Y. Song, B. F. Zheng, Y. Zhao, Q. Wang, X. Zhang, B. Zou and H. F. Zou, *Inorg. Chem. Front.*, 2023, **10**, 2788-2798.
  10. Z. B. Zheng, Z. Li, H. F. Zou, Q. Tao, Y. Zhao, Q. Wang, Z. Shi, Y. Song and L. Li,  $\text{Eu}^{2+}$  and  $\text{Mn}^{2+}$  Co-Doped  $\text{Lu}_2\text{Mg}_2\text{Al}_2\text{Si}_2\text{O}_{12}$  Phosphors for High Sensitivity and Multi-Mode Optical Pressure Sensing, *Inorg Chem*, 2024, **63**(9), 3882-3892.
  11. T. Zheng, M. Sójka, P. Woźny, I. R. Martín, V. Lavín, E. Zych, S. Lis, P. Du, L. Luo and M. Runowski, Supersensitive Ratiometric Thermometry and Manometry Based on Dual-Emitting Centers in  $\text{Eu}^{2+}/\text{Sm}^{2+}$ -Doped Strontium Tetraborate Phosphors, *Adv. Opt. Mater.*, 2022, **10**(20), 2201055.
  12. K. Su, L. Mei, Q. Guo, P. Shuai, Y. Wang, Y. Liu, Y. Jin, Z. Peng, B. Zou and L. Liao, Multi-Mode Optical Manometry Based on  $\text{Li}_4\text{SrCa}(\text{SiO}_4)_2:\text{Eu}^{2+}$  Phosphors, *Adv. Funct. Mater.*, 2023, **33**(49), 2305359.
  13. M. Szymczak, M. Runowski, M. G. Brik and L. Marciniak, Super-Sensitive Luminescent Manometer Based on Giant Pressure-Induced Spectral Shift of  $\text{Cr}^{3+}$  in the NIR Range, *Chem. Eng. J.*, 2023, **466**, 143130.
  14. M. Szymczak, P. Woźny, M. Runowski, M. Pieprz, V. Lavín and L.



- Marciniak, Temperature Invariant Ratiometric Luminescence Manometer Based on Cr<sup>3+</sup> Ions Emission, *Chem. Eng. J*, 2023, **453**, 139632.
15. M. Szymczak, M. Runowski, V. Lavín and L. Marciniak, Highly Pressure-Sensitive, Temperature Independent Luminescence Ratiometric Manometer Based on MgO:Cr<sup>3+</sup> Nanoparticles, *Laser Photonics Rev*, 2023, **17**(4), 2200801.
16. Y. Zhuo, F. Wu, Y. Niu, Y. Wang, Q. zhang, Y. Teng, H. Dong, Z. Mu, Super Broadband Emission Across NIR-I and NIR-II Under Blue Light Excitation of Cr<sup>3+</sup>, Ni<sup>2+</sup> Co-Doped Sr<sub>2</sub>GaTaO<sub>6</sub> Phosphor Achieved by Two-Site Occupation and Effective Energy Transfer, *Laser Photonics Rev*, 2024, **18**(8), 2400105.
